# Supplementary material
Source: PubMed Central journal article supplement (PMC8413008)
Supplement: NIHMS1735238-supplement-5.pdf [file NIHMS1735238-supplement-5.pdf]

| <b>Lit No.</b> | <b>Uniprot No.</b> | <b>Known Phosphosite</b> | <b>Surface Access</b> | <b>Comments</b>                           |
|----------------|--------------------|--------------------------|-----------------------|-------------------------------------------|
| S25            | S191               | Yes                      | 0.79                  | Also seen in ProteomicsDB.org             |
| S191           | S357               | Yes                      | 0.89                  |                                           |
| T262           | T428               | Yes                      | 0.75                  | Also seen three times in ProteomicsDB.org |
| S266           | S432               | Yes                      | 0.84                  |                                           |
| Y350           | Y516               | Yes                      | 0.21                  |                                           |
| S362           | S528               | Yes                      | 0.39                  |                                           |
| S554           | S720               | Yes                      | 0.41                  |                                           |
| Y557           | Y723               | Yes                      | 0.63                  | Also seen three times in ProteomicsDB.org |
