# Supplementary material
Source: PubMed Central journal article supplement (PMC8413008)
Supplement: NIHMS1735238-supplement-6.pdf [file NIHMS1735238-supplement-6.pdf]

| <b>Major Cavity Residues</b>                       |                  |                  |           |
|----------------------------------------------------|------------------|------------------|-----------|
| <b>(three letter code:residue number:chain ID)</b> |                  |                  |           |
| ASN:26:A                                           | <b>THR:117:C</b> | ARG:226:C        | LEU:338:C |
| PHE:29:A                                           | LEU:128:C        | CYS:232:C        | ILE:339:C |
| PHE:86:A                                           | ILE:144:C        | PHE:233:C        | LEU:361:C |
| MET:87:A                                           | PRO:145:C        | LEU:234:C        | PHE:365:C |
| GLN:88:A                                           | PHE:146:C        | ALA:235:C        | PHE:366:C |
| TRP:89:A                                           | PHE:147:C        | GLY:236:C        | GLU:401:C |
| GLY:90:A                                           | ARG:148:C        | ASP:237:C        | ILE:402:C |
| GLN:91:A                                           | <b>SER:149:C</b> | <b>THR:238:C</b> | LEU:406:C |
| LEU:92:A                                           | ILE:164:C        | ARG:239:C        | PHE:407:C |
| LEU:93:A                                           | ALA:166:C        | <b>SER:240:C</b> | GLU:408:C |
| ASP:94:A                                           | LEU:167:C        | <b>SER:241:C</b> | GLN:409:C |
| HIS:95:A                                           | <b>SER:179:C</b> | GLU:242:C        | VAL:410:C |
| LEU:97:A                                           | GLU:180:C        | MET:243:C        | MET:411:C |
| ASP:98:A                                           | LEU:183:C        | LEU:246:C        | ARG:412:C |
| PHE:99:A                                           | ASN:186:C        | <b>TYR:296:C</b> | ILE:413:C |
| <b>THR:100:A</b>                                   | ASP:214:C        | PHE:328:C        | LEU:415:C |
| PRO:101:A                                          | ASN:215:C        | <b>THR:329:C</b> | ASP:416:C |
| GLU:102:A                                          | LEU:216:C        | ASN:330:C        | LEU:417:C |
| PRO:103:A                                          | HIS:217:C        | PHE:332:C        | LEU:420:C |
| ALA:104:A                                          | ASP:218:C        | ARG:333:C        | ASN:421:C |
| VAL:113:C                                          | ASP:219:C        | <b>TYR:334:C</b> | ARG:424:C |
| ASN:114:C                                          | PRO:220:C        | GLY:335:C        | ASP:427:C |
| CYS:115:C                                          | CYS:221:C        | HIS:336:C        | HIS:428:C |
| GLU:116:C                                          | LEU:223:C        | <b>THR:337:C</b> |           |
