# Supplementary material
Source: PubMed Central journal article supplement (PMC8413008)

A)

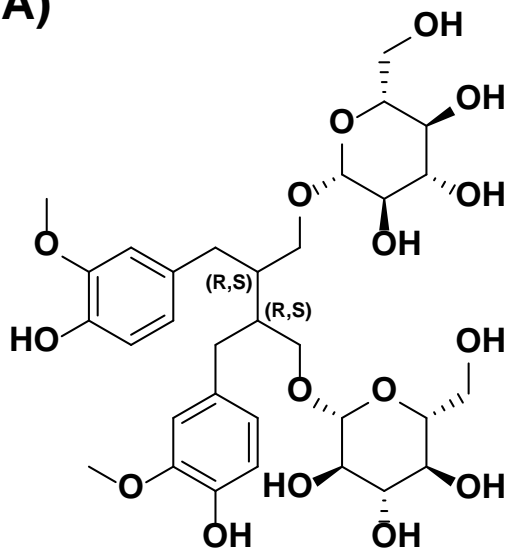

B)

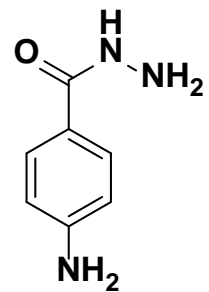

C)

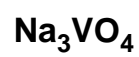

D)

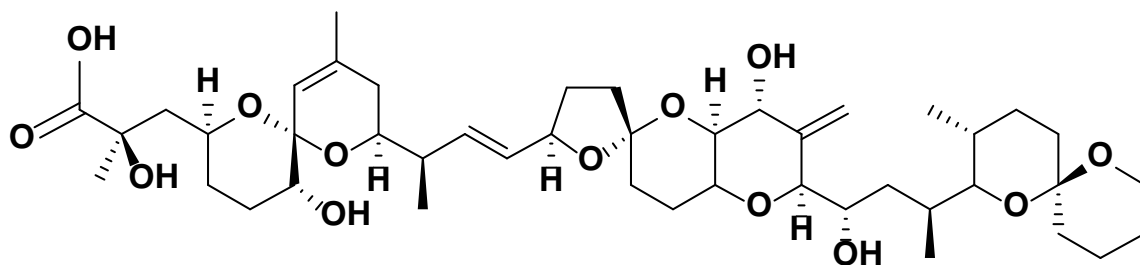

Supplement: NIHMS1735238-supplement-1.pdf [file NIHMS1735238-supplement-1.pdf]

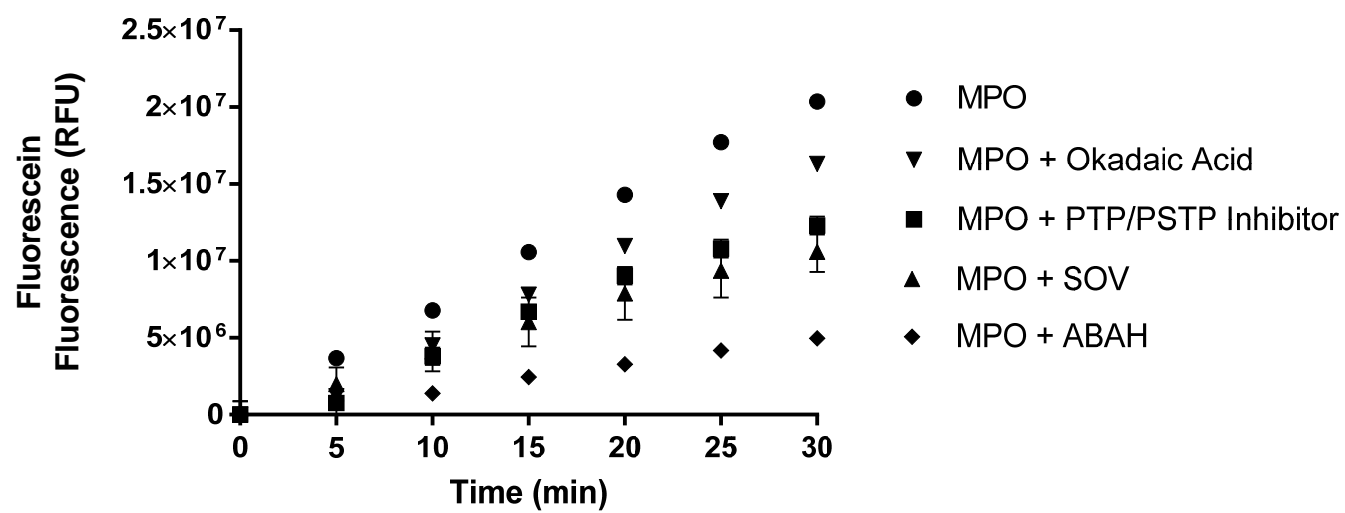

Supplemental Figure 2

Supplement: NIHMS1735238-supplement-2.pdf [file NIHMS1735238-supplement-2.pdf]

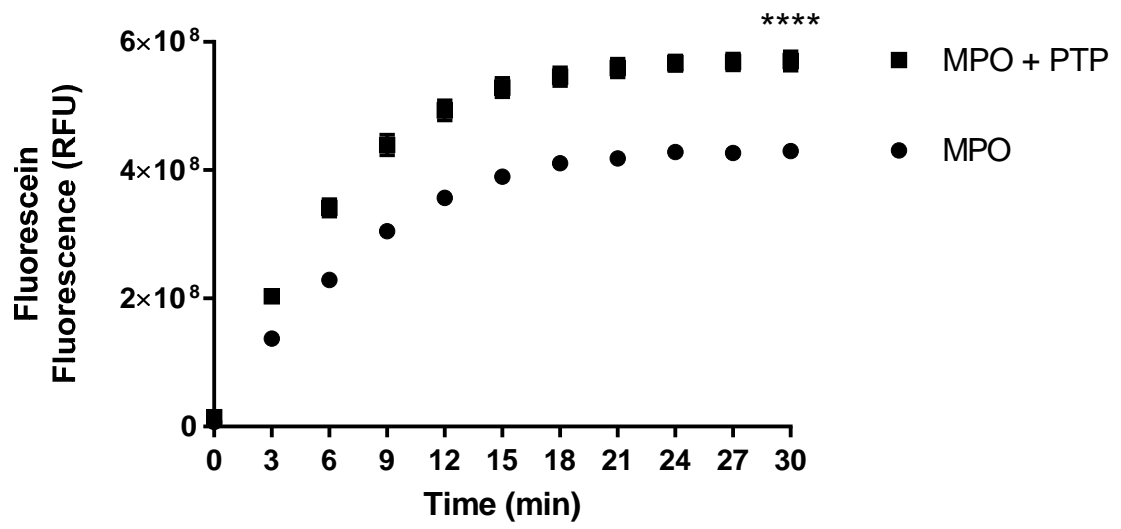

Supplemental Figure 3

Supplement: NIHMS1735238-supplement-3.pdf [file NIHMS1735238-supplement-3.pdf]

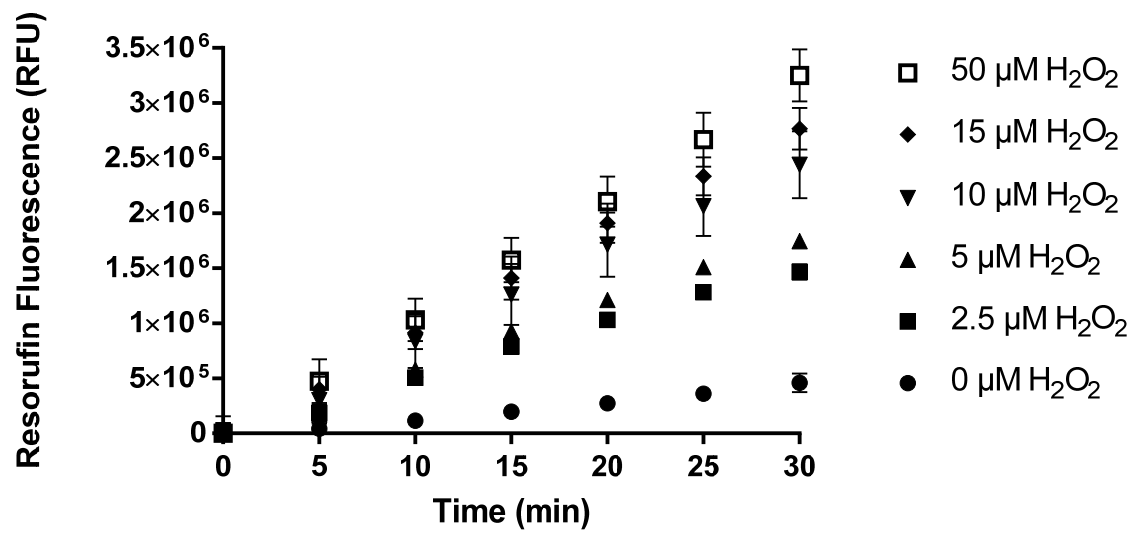

Supplemental Figure 4

Supplement: NIHMS1735238-supplement-4.pdf [file NIHMS1735238-supplement-4.pdf]
